# Supplementary material
Source: PubMed Central journal article supplement (PMC3173876)

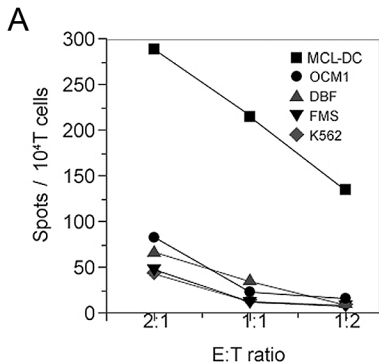

**B**

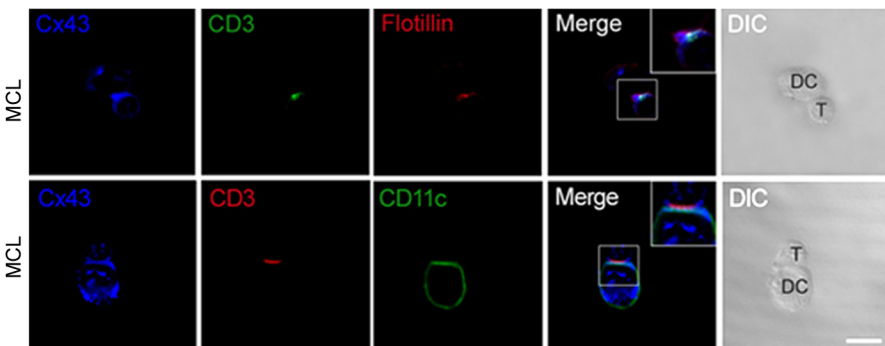

**C**

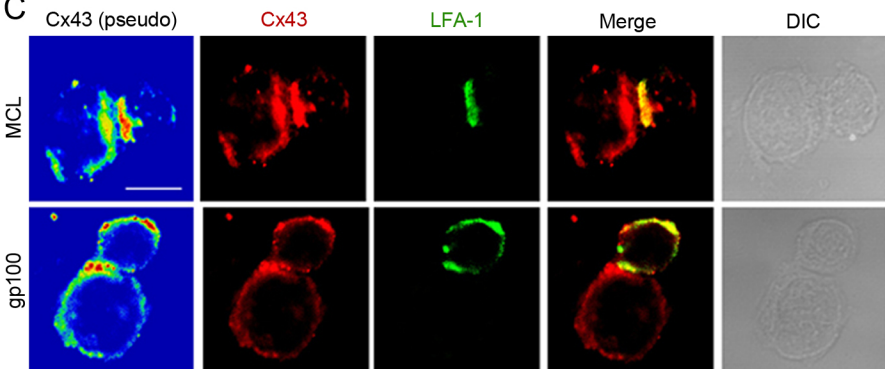

Supplement: NIHMS35999-supplement-2.pdf [file NIHMS35999-supplement-2.pdf]

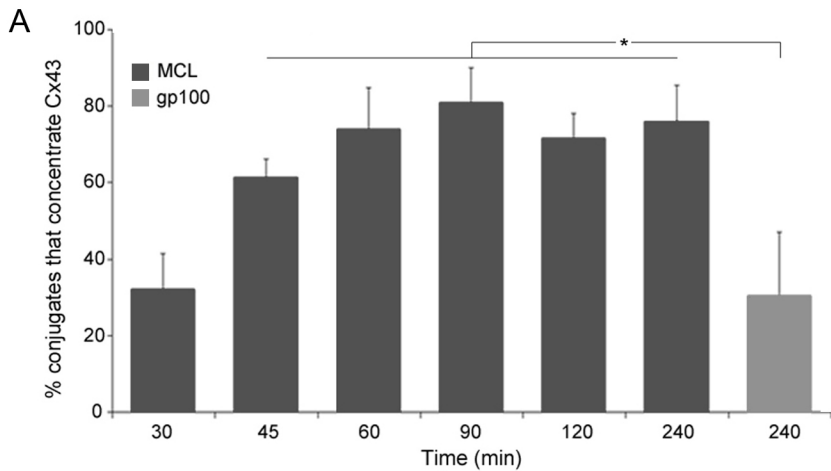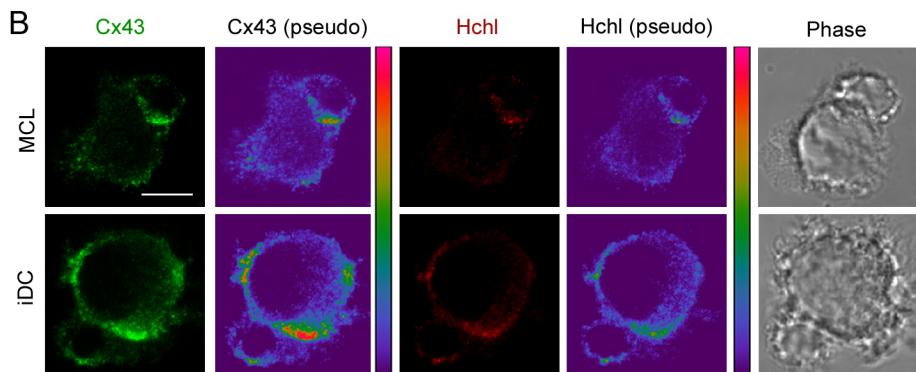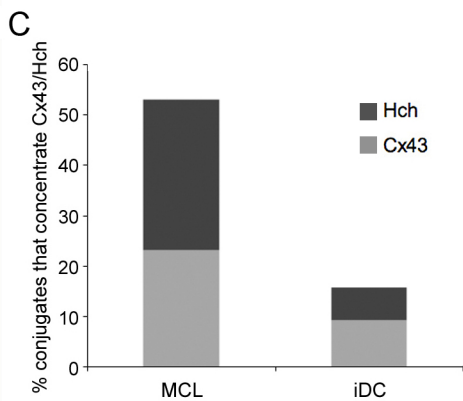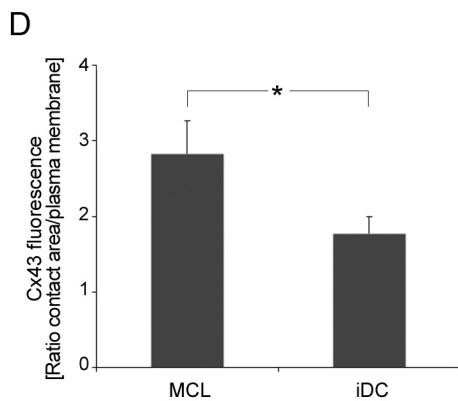

Supplement: NIHMS35999-supplement-3.pdf [file NIHMS35999-supplement-3.pdf]

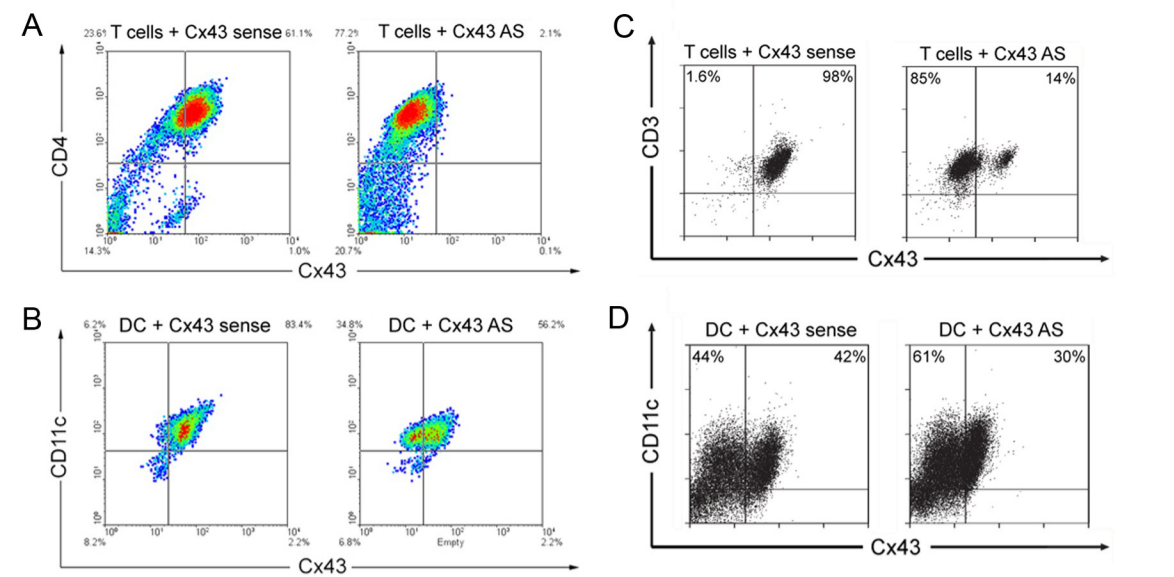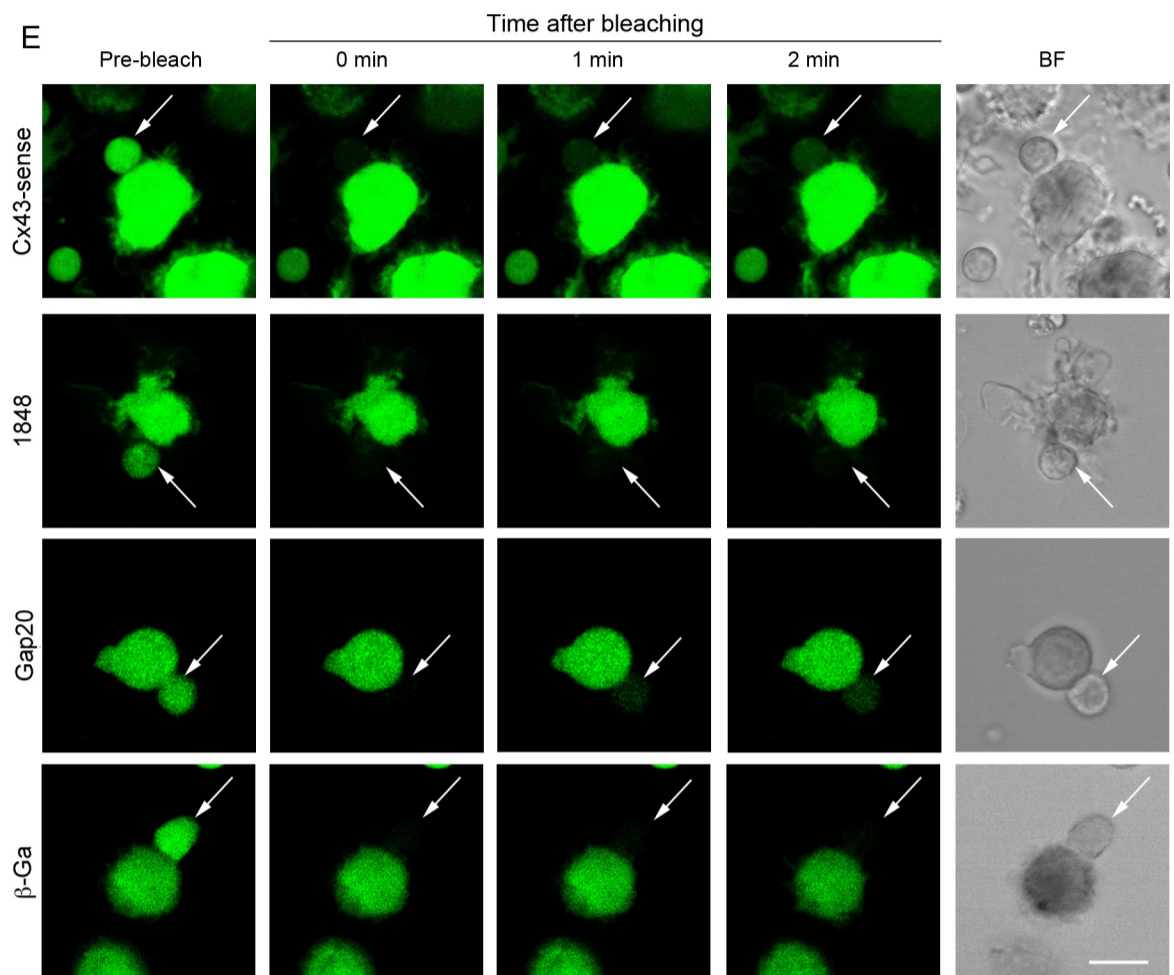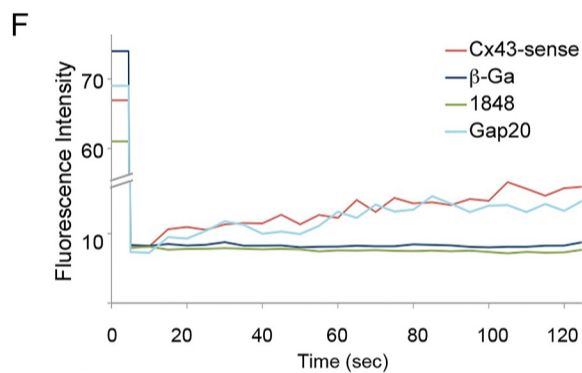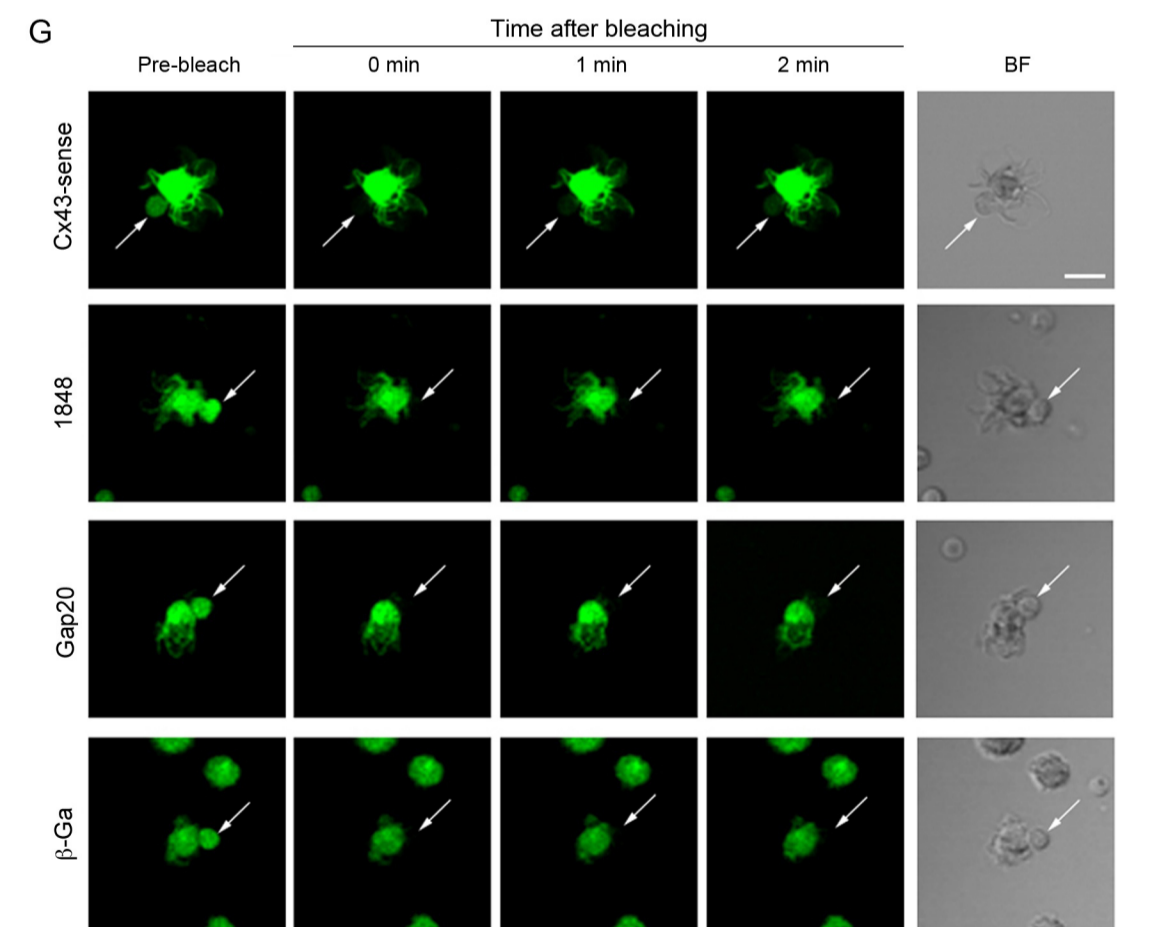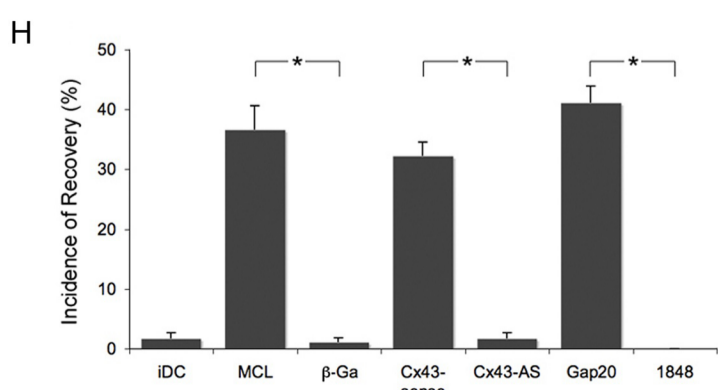

Supplement: NIHMS35999-supplement-4.pdf [file NIHMS35999-supplement-4.pdf]

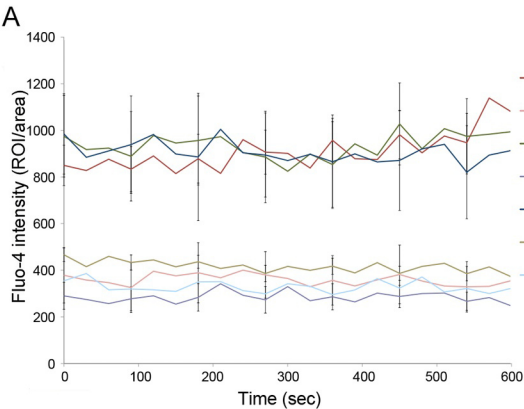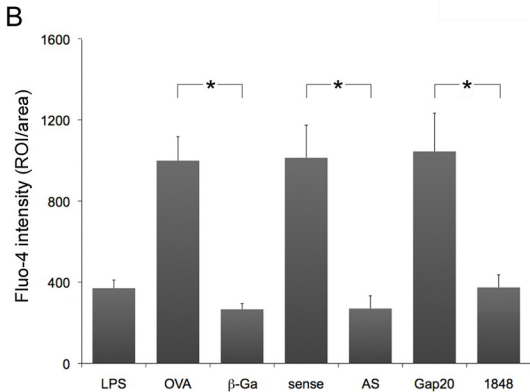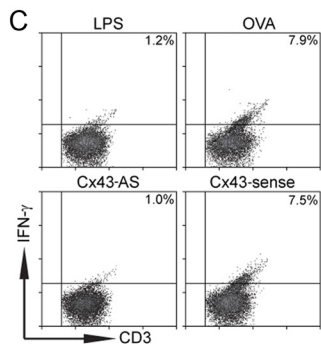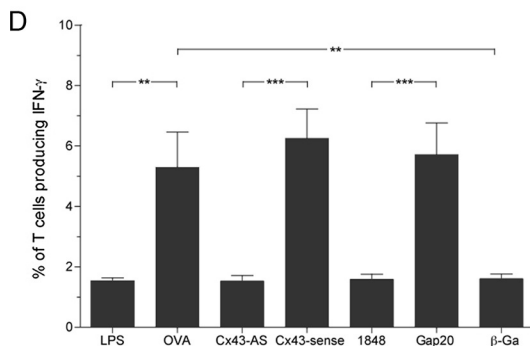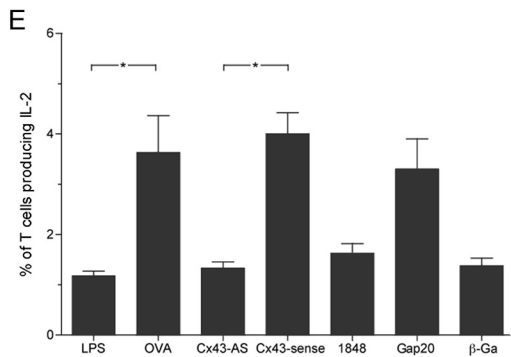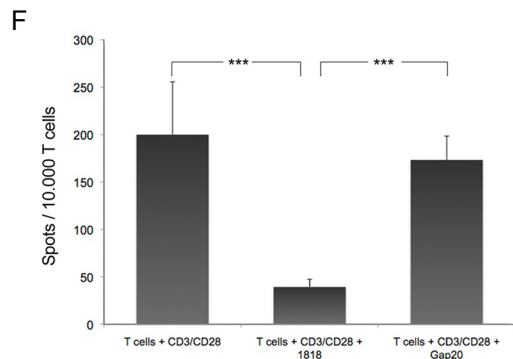

Supplement: NIHMS35999-supplement-5.pdf [file NIHMS35999-supplement-5.pdf]
